# Supplementary material
Source: PubMed Central journal article supplement (PMC2729667)
Supplement: ddp291_1.pdf [file ddp291_1.pdf]

## Supplementary Figure Legends

**Supplementary Figure 1. Gene expression profile changes.** Expression profiles of DNA repair genes before (RTS cells, R0, or normal cells, N0) or 6, 12, or 24h after menadione treatment. The red represents up-regulated and green represents down-regulated gene expression.

**Supplementary Figure 2. Sensitivity of RTS and control fibroblasts to menadione.** Normal (GM0323) and primary RTS (AG5013) fibroblast cell lines were exposed to 50, 100 or 200  $\mu$ M menadione (Sigma, MO, USA) for 1 hour. Cells were washed in PBS and then plated in 6-well plates at a density of 333 cells/well. Cells were allowed to grow in Amniomax-II Complete media ((Invitrogen, CA, USA) for seven days at 37 °C at 5% CO<sub>2</sub>. On the day of the analysis, the plates with adherent cells were incubated with CyQuant dye (Molecular Probes, OR, USA).for 30 min in the dark at 37 °C with 5% CO<sub>2</sub>. Fluorescence intensity, which is proportional to cell number, was measured on a Typhoon 8600 fluorescent scanner (Molecular Dynamics, CA, USA) with filters set at 480 nm excitation and 520 nm emission. Fluorescence data was analyzed and cell number estimated using ImageQuant TL (Molecular Dynamics). Significant p-values, denoted by the asterisk, between the normal and RTS cells were 0.0019, 0.0014, and 0.0255 for 50, 100 or 200  $\mu$ M menadione, respectively.

**Supplementary Figure 3. RECQL4 can directly interact with FEN1.** 3xFlag-RECQL4 was immunoprecipitated from HeLa cells that had been transfected (+) or not (-) with pCMV23xFlag RECQL4 and purified under high salt conditions as described in the Materials and Methods section. Purified FEN1 (1  $\mu$ g) was added to the beads and then the beads were washed with RIPA buffer five times. Lane 1, purified FEN1 (0.1  $\mu$ g), lanes 2-3, 1/10 of each lysate, lanes 4-5, bead bound proteins. Western blot on top was probe with rabbit anti-Flag (Sigma) and the bottom was probe with rabbit and FEN1 (abCam) as described in the Materials and Methods.

**Supplementary Figure 1.**

Expression profile of DNA repair genes before (RTS cells, R0, or normal cells, N0) or 6, 12, or 24h after menadione treatment. The red represents up-regulated and green represents down-regulated gene expression.

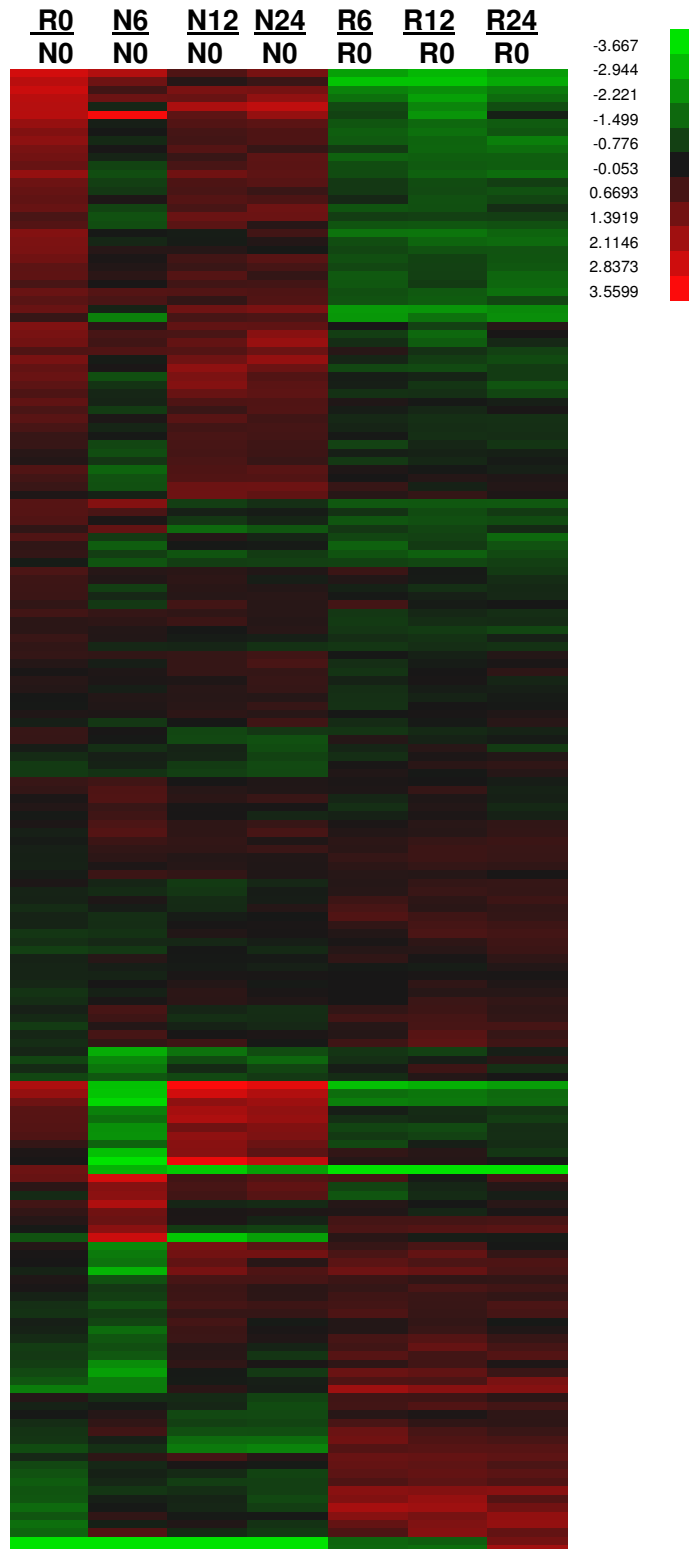

Supplementary Figure 2

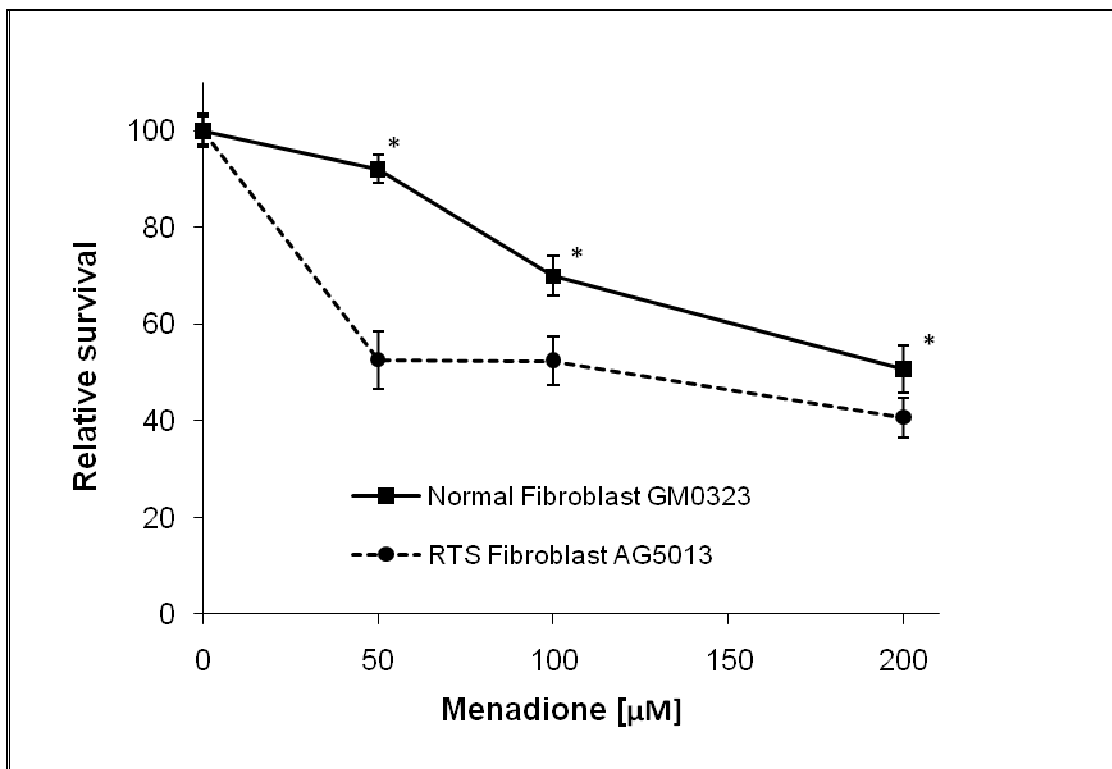

**Supplementary Figure 2. Sensitivity of RTS and control fibroblasts to menadione.**

Normal (GM0323) and primary RTS (AG5013) fibroblast cell lines were exposed to 50, 100 or 200  $\mu\text{M}$  menadione (Sigma, MO, USA) for 1 hour. Cells were washed in PBS and then plated in 6-well plates at a density of 333 cells/well. Cells were allowed to grow in Amniomax-II Complete media ((Invitrogen, CA, USA) for seven days at 37 °C at 5%  $\text{CO}_2$ . On the day of the analysis, the plates with adherent cells were incubated with CyQuant dye (Molecular Probes, OR, USA) for 30 min in the dark at 37 °C with 5%  $\text{CO}_2$ . Fluorescence intensity, which is proportional to cell number, was measured on a Typhoon 8600 fluorescent scanner (Molecular Dynamics, CA, USA) with filters set at 480 nm excitation and 520 nm emission. Fluorescence data was analyzed and cell number estimated using ImageQuant TL (Molecular Dynamics). Significant p-values, denoted by the asterisk, between the normal and RTS cells were 0.0019, 0.0014, and 0.0255 for 50, 100 or 200  $\mu\text{M}$  menadione, respectively.

Supplementary Figure 3

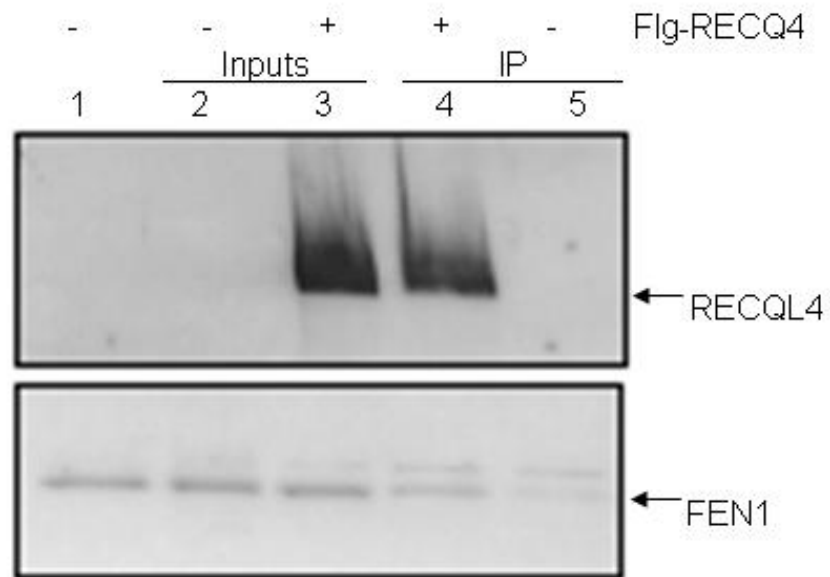

**Supplementary Figure 3. RECQL4 can directly interact with FEN1.** 3xFlag-RECQL4 was immunoprecipitated from HeLa cells that had been transfected (+) or not (-) with pCMV23xFlag RECQL4 and purified under high salt conditions as described in the Materials and Methods section. Purified FEN1 (1  $\mu$ g) was added to the beads and then the beads were washed with RIPA buffer five times. Lane 1, purified FEN1 (0.1  $\mu$ g), lanes 2-3, 1/10 of each lysate, lanes 4-5, bead bound proteins. Western blot on top was probe with rabbit anti-Flag (Sigma) and the bottom was probe with rabbit and FEN1 (abCam) as described in the Materials and Methods.

Supplementary Table 1

All annotated DNA repair and related genes in the gene ontology group DNA Repair from the Broad Institute at MIT.

This table lists the Z-ratios at each time point for each gene.

The genes in bold are those we grouped into the long and short patch BER pathways.

| SYMBOL       | DEFINITION                                                                                                                                      | Z ratio<br>R0-N0 | Z ratio<br>N6-N0 | Z ratio<br>N12-N0 | Z ratio<br>N24-N0 | Z ratio<br>R6-R0 | Z ratio<br>R12-R0 | Z ratio<br>R24-R0 |
|--------------|-------------------------------------------------------------------------------------------------------------------------------------------------|------------------|------------------|-------------------|-------------------|------------------|-------------------|-------------------|
| ADA          | adenosine deaminase (ADA)                                                                                                                       | 1.232            | 0.899            | 0.879             | 0.816             | -1.044           | -1.213            | -1.636            |
| ALKBH2       | alkB, alkylation repair homolog 2 (E. coli) (ALKBH2)                                                                                            | 1.561            | -0.328           | -0.125            | 0.123             | -1.001           | -1.453            | -1.517            |
| ALKBH3       | alkB, alkylation repair homolog 3 (E. coli) (ALKBH3)                                                                                            | 0.343            | -0.330           | -0.291            | -0.515            | -0.594           | -0.449            | -0.520            |
| <b>APEX1</b> | <b>APEX nuclease (multifunctional DNA repair enzyme) 1 (APEX1), transcript variant 3</b>                                                        | <b>0.989</b>     | <b>0.747</b>     | <b>0.372</b>      | <b>0.859</b>      | <b>-1.100</b>    | <b>-1.277</b>     | <b>-0.881</b>     |
| APEX2        | APEX nuclease (apurinic/aprimidinic endonuclease) 2 (APEX2), nuclear gene encoding mitochondrial protein aprataxin (APTX), transcript variant 5 | 1.470            | -0.036           | 0.910             | 0.436             | -0.692           | -1.449            | -1.584            |
| APTX         | ASF1 anti-silencing function 1 homolog A (S. cerevisiae) (ASF1A) ataxia telangiectasia mutated (ATM), transcript variant 1                      | 0.439            | -0.026           | -0.889            | -0.607            | -0.574           | -0.365            | -0.261            |
| ASF1A        | ataxia telangiectasia mutated (ATM), transcript variant 1                                                                                       | -0.135           | -1.136           | -0.731            | -0.776            | -0.819           | -0.903            | -0.751            |
| ATM          | ataxia telangiectasia and Rad3 related (ATR)                                                                                                    | -0.536           | 0.611            | -1.037            | -1.029            | 1.277            | 0.706             | 0.482             |
| ATR          | alpha thalassemia/mental retardation syndrome X-linked (RAD54 homolog, S. cerevisiae) (ATRX), transcript variant 1                              | -0.088           | 0.103            | 0.224             | 0.435             | -0.502           | -0.051            | -0.079            |
| ATRX         | BRCA2 and CDKN1A interacting protein (BCCIP), transcript variant B                                                                              | -0.313           | 0.681            | -0.035            | 0.027             | 0.154            | 0.956             | 0.432             |
| BCCIP        | B double prime 1, subunit of RNA polymerase III transcription initiation factor IIIB (BDP1)                                                     | 1.126            | -0.974           | 0.715             | 0.866             | -0.695           | -1.167            | -0.639            |
| BDP1         | Bloom syndrome (BLM)                                                                                                                            | 0.079            | 0.047            | 0.281             | 0.209             | -0.063           | -0.011            | 0.074             |
| BLM          | breast cancer 1, early onset (BRCA1), transcript variant BRCA1-delta14-17                                                                       | -0.015           | -0.638           | 0.516             | 0.252             | 0.391            | 0.733             | 0.588             |
| BRCA1        | BRCA1 interacting protein C-terminal helicase 1 (BRIP1)                                                                                         | -0.215           | -2.435           | 1.725             | 0.888             | 1.081            | 1.098             | 0.317             |
| BRIP1        | cyclin H (CCNH)                                                                                                                                 | -0.069           | 0.134            | 0.185             | 0.165             | -0.487           | -0.253            | -0.123            |
| CCNH         | cell division cycle 2, G1 to S and G2 to M (CDC2), transcript variant 1                                                                         | 1.643            | -0.085           | -0.151            | 0.620             | -1.693           | -1.720            | -1.410            |
| CDC2         | chromatin assembly factor 1, subunit A (p150) (CHAF1A)                                                                                          | 2.390            | -1.911           | 2.705             | 2.605             | -2.082           | -1.881            | -2.269            |
| CHAF1A       | chromatin assembly factor 1, subunit B (p60) (CHAF1B)                                                                                           | -0.012           | -1.833           | 1.399             | 1.407             | 0.753            | 1.141             | 0.381             |
| CHAF1B       | CHK1 checkpoint homolog (S. pombe) (CHEK1)                                                                                                      | 0.055            | -3.058           | 1.704             | 1.012             | 0.365            | 0.199             | -0.588            |
| CHEK1        | claspin homolog (Xenopus laevis) (CLSPN)                                                                                                        | 0.884            | -1.012           | 0.994             | 0.192             | -1.125           | -1.170            | -1.058            |
| CLSPN        |                                                                                                                                                 | 0.071            | -0.240           | 1.307             | 1.098             | 0.197            | 0.391             | 0.055             |

|         |                                                                                                                                                                    |        |        |        |        |        |        |        |
|---------|--------------------------------------------------------------------------------------------------------------------------------------------------------------------|--------|--------|--------|--------|--------|--------|--------|
| CRB2    | crumbs homolog 2 (Drosophila) (CRB2)                                                                                                                               | 0.025  | 0.845  | 0.250  | 0.465  | -0.309 | 0.073  | -0.207 |
| CRY1    | cryptochrome 1 (photolyase-like) (CRY1)                                                                                                                            | -0.753 | -0.623 | -0.062 | -0.359 | 0.179  | 0.211  | 0.515  |
| CRY2    | cryptochrome 2 (photolyase-like) (CRY2)                                                                                                                            | -0.247 | 0.198  | -0.079 | -0.090 | 0.338  | -0.021 | 0.320  |
| CSNK1D  | casein kinase 1, delta (CSNK1D), transcript variant 1                                                                                                              | -1.252 | -1.379 | -0.555 | -1.348 | 1.278  | 1.681  | 0.553  |
| CSNK1E  | casein kinase 1, epsilon (CSNK1E), transcript variant 1                                                                                                            | 0.359  | -0.665 | 0.537  | 0.373  | -0.244 | -0.236 | -0.876 |
| CUL4A   | cullin 4A (CUL4A), transcript variant 2                                                                                                                            | -1.092 | -0.217 | -0.381 | -0.822 | 1.029  | 1.138  | 1.002  |
| DCLRE1A | DNA cross-link repair 1A (PSO2 homolog, S. cerevisiae) (DCLRE1A)                                                                                                   | -0.192 | -0.861 | 0.673  | -0.119 | 0.134  | 0.368  | -0.077 |
| DCLRE1B | DNA cross-link repair 1B (PSO2 homolog, S. cerevisiae) (DCLRE1B)                                                                                                   | -0.232 | -0.742 | 0.541  | 0.277  | 0.570  | 0.476  | 0.367  |
| DCLRE1C | DNA cross-link repair 1C (PSO2 homolog, S. cerevisiae) (DCLRE1C), transcript variant c                                                                             | -0.393 | -1.166 | 0.502  | 0.088  | 0.678  | 0.908  | 0.426  |
| DDB1    | PREDICTED: damage-specific DNA binding protein 1, 127kDa (DDB1)                                                                                                    | -0.012 | 0.496  | -0.646 | -0.567 | -0.336 | -0.091 | -0.487 |
| DDB2    | damage-specific DNA binding protein 2, 48kDa (DDB2)                                                                                                                | 2.508  | 1.314  | 0.179  | 0.472  | -3.123 | -3.127 | -2.662 |
| EAF1    | ELL associated factor 1 (EAF1)                                                                                                                                     | -0.297 | -2.723 | -1.702 | -0.990 | -0.571 | -0.788 | -0.184 |
| EEF1E1  | eukaryotic translation elongation factor 1 epsilon 1 (EEF1E1)                                                                                                      | 1.387  | 0.590  | 1.147  | 1.986  | -0.433 | -1.279 | -0.353 |
| EME1    | essential meiotic endonuclease 1 homolog 1 (S. pombe) (EME1)                                                                                                       | 0.205  | -1.002 | 0.669  | 0.535  | -0.184 | -0.240 | -0.212 |
| EPC2    | enhancer of polycomb homolog 2 (Drosophila) (EPC2)                                                                                                                 | -0.212 | 0.265  | 0.152  | 0.097  | 0.406  | 0.527  | 0.446  |
| ERCC1   | excision repair cross-complementing rodent repair deficiency, complementation group 1 (includes overlapping antisense sequence) (ERCC1), transcript variant 2      | 0.995  | 0.609  | 0.425  | 0.589  | -1.296 | -1.331 | -1.184 |
| ERCC2   | excision repair cross-complementing rodent repair deficiency, complementation group 2 (xeroderma pigmentosum D) (ERCC2)                                            | -1.124 | -0.593 | -0.451 | -0.757 | 1.746  | 1.663  | 1.733  |
| ERCC3   | excision repair cross-complementing rodent repair deficiency, complementation group 3 (xeroderma pigmentosum group B complementing) (ERCC3)                        | 0.035  | -0.300 | -0.665 | -0.337 | 0.160  | 0.390  | 0.413  |
| ERCC5   | excision repair cross-complementing rodent repair deficiency, complementation group 5 (xeroderma pigmentosum, complementation group G (Cockayne syndrome)) (ERCC5) | -0.582 | -0.202 | -1.531 | -1.580 | 1.381  | 0.833  | 0.712  |
| ERCC6   | excision repair cross-complementing rodent repair                                                                                                                  | 0.375  | 0.809  | 0.192  | 0.092  | 0.049  | 0.415  | -0.239 |

|             |                                                                         |              |               |              |              |               |               |               |
|-------------|-------------------------------------------------------------------------|--------------|---------------|--------------|--------------|---------------|---------------|---------------|
|             | deficiency, complementation group 6 (ERCC6)                             |              |               |              |              |               |               |               |
| EXO1        | exonuclease 1 (EXO1), transcript variant 1                              | -0.798       | -4.259        | 0.199        | 0.088        | 0.453         | 0.470         | 0.643         |
| FANCA       | Fanconi anemia, complementation group A (FANCA), transcript variant 1   | -0.218       | 0.043         | 0.172        | 0.088        | 0.276         | 0.402         | 0.329         |
| FANCB       | Fanconi anemia, complementation group B (FANCB), transcript variant 1   | 1.277        | -0.537        | 1.222        | 1.387        | -0.802        | -0.798        | -0.561        |
| FANCC       | Fanconi anemia, complementation group C (FANCC)                         | -0.442       | 0.369         | 0.552        | -0.084       | 0.561         | 1.033         | 0.571         |
| FANCD2      | Fanconi anemia, complementation group D2 (FANCD2), transcript variant 2 | 1.340        | -2.374        | 2.315        | 2.539        | -0.287        | -1.011        | -0.936        |
| FANCG       | Fanconi anemia, complementation group G (FANCG)                         | 1.038        | -0.537        | 1.662        | 1.002        | -0.193        | -0.584        | -1.136        |
| FANCI       | Fanconi anemia, complementation group I (FANCI)                         | -0.264       | -2.843        | 1.459        | 0.808        | 1.317         | 1.178         | 0.708         |
| FANCL       | Fanconi anemia, complementation group L (FANCL)                         | 1.127        | 0.004         | 1.839        | 1.267        | -0.892        | -0.946        | -0.678        |
| FBXO18      | F-box protein, helicase, 18 (FBXO18), transcript variant 2              | -1.167       | -0.181        | -0.282       | -0.923       | 1.624         | 1.948         | 0.883         |
| <b>FEN1</b> | flap structure-specific endonuclease 1 (FEN1)                           | <b>0.954</b> | <b>-1.918</b> | <b>2.181</b> | <b>1.866</b> | <b>-0.167</b> | <b>-0.393</b> | <b>-0.557</b> |
| GADD45A     | growth arrest and DNA-damage-inducible, alpha (GADD45A)                 | 1.293        | -2.805        | -3.242       | -2.471       | -4.930        | -3.994        | -4.435        |
| GIYD2       | GIY-YIG domain containing 2 (GIYD2), transcript variant 1               | 0.134        | -0.590        | 0.747        | 0.443        | -0.646        | -0.328        | -0.108        |
| GTF2H1      | general transcription factor IIH, polypeptide 1, 62kDa (GTF2H1)         | -0.969       | -0.490        | -1.825       | -1.977       | 0.886         | 0.954         | 0.936         |
| GTF2H2      | general transcription factor IIH, polypeptide 2, 44kDa (GTF2H2)         | 1.389        | -0.278        | 0.467        | 1.030        | -1.384        | -1.317        | -1.308        |
| GTF2H3      | general transcription factor IIH, polypeptide 3, 34kDa (GTF2H3)         | 0.845        | -0.668        | 0.168        | -0.279       | -0.882        | -0.798        | -1.478        |
| GTF2H4      | general transcription factor IIH, polypeptide 4, 52kDa (GTF2H4)         | -0.383       | -1.717        | -0.371       | -0.868       | -0.154        | 0.543         | -0.494        |
| GTF2H5      | general transcription factor IIH, polypeptide 5 (GTF2H5)                | 2.461        | 3.476         | 1.054        | 1.938        | -0.819        | -2.295        | -0.207        |
| HAT1        | histone acetyltransferase 1 (HAT1), transcript variant 1                | 2.203        | -0.966        | 1.265        | 2.335        | -2.087        | -2.575        | -2.330        |
| HSPA1A      | heat shock 70kDa protein 1A (HSPA1A)                                    | -6.431       | 11.836        | -7.363       | -5.109       | -1.459        | -1.313        | 1.413         |
| HSPA1B      | heat shock 70kDa protein 1B (HSPA1B)                                    | -7.066       | 11.240        | -9.150       | -5.519       | -1.487        | -1.588        | 2.121         |
| HUS1        | HUS1 checkpoint homolog (S. pombe) (HUS1)                               | -0.438       | 0.009         | 0.260        | 0.101        | -0.051        | 0.502         | 0.359         |
| IGHMBP2     | immunoglobulin mu binding protein 2 (IGHMBP2)                           | -0.179       | -0.607        | -0.065       | 0.593        | -0.404        | -0.099        | 0.207         |
| INPP5E      | inositol polyphosphate-5-phosphatase, 72 kDa (INPP5E)                   | 1.356        | 0.014         | 0.626        | 0.945        | -1.050        | -0.813        | -1.126        |
| KCTD13      | potassium channel tetramerisation domain containing 13 (KCTD13)         | 0.475        | 0.117         | -0.125       | -0.191       | -0.429        | -0.525        | -0.201        |

|              |                                                                                                              |               |               |               |               |               |               |               |
|--------------|--------------------------------------------------------------------------------------------------------------|---------------|---------------|---------------|---------------|---------------|---------------|---------------|
| KIN          | KIN, antigenic determinant of recA protein homolog (mouse) (KIN)                                             | -0.278        | -0.170        | -0.112        | -0.197        | -0.090        | -0.144        | 0.136         |
| <b>LIG1</b>  | ligase I, DNA, ATP-dependent (LIG1)                                                                          | <b>1.924</b>  | <b>-1.014</b> | <b>1.354</b>  | <b>1.049</b>  | <b>-0.969</b> | <b>-1.365</b> | <b>-1.568</b> |
| <b>LIG3</b>  | ligase III, DNA, ATP-dependent (LIG3), nuclear gene encoding mitochondrial protein, transcript variant alpha | <b>-0.045</b> | <b>-0.197</b> | <b>0.525</b>  | <b>0.263</b>  | <b>0.449</b>  | <b>0.419</b>  | <b>0.339</b>  |
| LIG4         | ligase IV, DNA, ATP-dependent (LIG4), transcript variant 2                                                   | -0.354        | -0.281        | -0.059        | -0.018        | -0.062        | 0.208         | 0.123         |
| LRP1         | low density lipoprotein-related protein 1 (alpha-2-macroglobulin receptor) (LRP1)                            | 1.199         | 2.923         | 0.606         | 0.891         | 0.695         | -0.126        | 0.707         |
| MBD4         | methyl-CpG binding domain protein 4 (MBD4)                                                                   | -0.886        | -1.183        | -0.920        | -0.648        | -0.411        | 0.144         | -0.041        |
| MCL1         | myeloid cell leukemia sequence 1 (BCL2-related) (MCL1), transcript variant 2                                 | 0.102         | 0.294         | 0.245         | 0.109         | -0.181        | 0.063         | -0.331        |
| MDC1         | mediator of DNA damage checkpoint 1 (MDC1)                                                                   | 1.307         | -0.751        | 0.787         | 0.949         | -0.629        | -0.995        | -0.733        |
| MGMT         | O-6-methylguanine-DNA methyltransferase (MGMT)                                                               | 0.362         | 1.355         | 0.014         | 0.067         | 0.074         | -0.320        | 0.005         |
| MLH1         | mutL homolog 1, colon cancer, nonpolyposis type 2 (E. coli) (MLH1)                                           | -0.232        | -1.563        | 0.517         | 0.002         | 0.122         | 0.465         | 0.085         |
| MLL          | myeloid/lymphoid or mixed-lineage leukemia (trithorax homolog, Drosophila) (MLL)                             | -0.241        | -0.119        | -0.310        | -0.976        | 0.616         | 0.860         | 0.631         |
| MNAT1        | menage a trois homolog 1, cyclin H assembly factor (Xenopus laevis) (MNAT1)                                  | 1.625         | -0.059        | 0.671         | 0.812         | -1.316        | -1.651        | -1.151        |
| MPG          | N-methylpurine-DNA glycosylase (MPG), transcript variant 2                                                   | -0.144        | 0.358         | 0.242         | -0.154        | 0.304         | 0.585         | 0.438         |
| MRE11A       | MRE11 meiotic recombination 11 homolog A (S. cerevisiae) (MRE11A), transcript variant 1                      | 0.821         | -0.001        | 0.193         | -0.040        | -0.783        | -0.346        | -0.349        |
| MSH2         | mutS homolog 2, colon cancer, nonpolyposis type 1 (E. coli) (MSH2)                                           | 0.453         | -0.881        | 0.705         | 0.556         | -0.804        | -0.320        | -0.584        |
| MSH3         | mutS homolog 3 (E. coli) (MSH3)                                                                              | 0.178         | 1.252         | 0.031         | -0.254        | 0.647         | 0.657         | 0.703         |
| MSH6         | mutS homolog 6 (E. coli) (MSH6)                                                                              | -1.870        | -1.860        | 0.237         | -0.144        | 2.076         | 1.747         | 1.680         |
| MSI1         | musashi homolog 1 (Drosophila) (MSI1)                                                                        | 0.256         | 0.132         | -0.056        | 0.216         | -0.599        | -0.682        | -0.889        |
| MUS81        | MUS81 endonuclease homolog (S. cerevisiae) (MUS81)                                                           | 1.609         | 0.259         | 1.115         | 1.085         | -0.040        | -0.798        | 0.198         |
| MUTYH        | mutY homolog (E. coli) (MUTYH), transcript variant gamma2                                                    | 1.802         | -0.370        | 0.614         | 0.813         | -1.229        | -1.421        | -1.896        |
| NBN          | nibrin (NBN), transcript variant 1                                                                           | -0.645        | -1.199        | 0.214         | -0.582        | 0.931         | 0.626         | 0.885         |
| NCOA6        | nuclear receptor coactivator 6 (NCOA6)                                                                       | -0.422        | 0.345         | -0.769        | -0.848        | 0.738         | 0.339         | 0.282         |
| <b>NEIL1</b> | nei endonuclease VIII-like 1 (E. coli) (NEIL1)                                                               | <b>0.131</b>  | <b>0.454</b>  | <b>-0.012</b> | <b>-0.029</b> | <b>-0.464</b> | <b>0.134</b>  | <b>-0.356</b> |
| NEIL2        | nei like 2 (E. coli) (NEIL2)                                                                                 | 0.139         | -0.424        | -0.375        | -0.828        | 0.585         | 0.559         | 0.257         |
| NEIL3        | nei endonuclease VIII-like 3 (E. coli) (NEIL3)                                                               | 0.392         | -1.413        | 1.736         | 1.265         | -0.895        | -0.195        | -0.424        |



|              |                                                                                                         |              |               |               |               |               |               |               |
|--------------|---------------------------------------------------------------------------------------------------------|--------------|---------------|---------------|---------------|---------------|---------------|---------------|
| NHEJ1        | nonhomologous end-joining factor 1 (NHEJ1)                                                              | -0.197       | 0.907         | 0.309         | 0.698         | 0.135         | 0.195         | 0.361         |
| NONO         | non-POU domain containing, octamer-binding (NONO)                                                       | 0.626        | 0.419         | 0.331         | 0.205         | -0.617        | -0.328        | -0.449        |
| NSMCE1       | non-SMC element 1 homolog (S. cerevisiae) (NSMCE1)                                                      | 0.462        | 0.595         | -0.046        | 0.086         | 0.011         | -0.049        | -0.145        |
| NSMCE2       | non-SMC element 2, MMS21 homolog (S. cerevisiae) (NSMCE2)                                               | 0.860        | 0.026         | -0.615        | -0.296        | -1.143        | -1.037        | -0.977        |
| <b>NTHL1</b> | nth endonuclease III-like 1 (E. coli) (NTHL1)                                                           | <b>0.540</b> | <b>0.113</b>  | <b>0.291</b>  | <b>-0.163</b> | <b>0.108</b>  | <b>-0.122</b> | <b>-0.412</b> |
| NUDT1        | nudix (nucleoside diphosphate linked moiety X)-type motif 1 (NUDT1), transcript variant 3A              | 0.618        | -1.093        | 0.856         | 0.879         | -0.042        | 0.158         | 0.062         |
| <b>OGG1</b>  | 8-oxoguanine DNA glycosylase (OGG1), nuclear gene encoding mitochondrial protein, transcript variant 1a | <b>1.026</b> | <b>0.120</b>  | <b>0.483</b>  | <b>0.681</b>  | <b>-0.898</b> | <b>-0.796</b> | <b>-1.190</b> |
| PAN3         | PAN3 polyA specific ribonuclease subunit homolog (S. cerevisiae) (PAN3)                                 | 0.920        | 0.751         | -0.202        | -0.125        | -0.526        | -0.974        | -0.665        |
| PARP1        | poly (ADP-ribose) polymerase family, member 1 (PARP1)                                                   | -1.142       | 0.357         | -0.096        | -0.079        | 1.717         | 1.458         | 1.892         |
| PARP2        | poly (ADP-ribose) polymerase family, member 2 (PARP2), transcript variant 2                             | 0.520        | -0.745        | 0.228         | 0.150         | -0.227        | -0.469        | -0.356        |
| PCNA         | proliferating cell nuclear antigen (PCNA), transcript variant 2                                         | 0.906        | -0.103        | 1.367         | 1.522         | -1.338        | -1.015        | -0.975        |
| PMS2         | PMS2 postmeiotic segregation increased 2 (S. cerevisiae) (PMS2), transcript variant 2, transcribed RNA. | 2.493        | 1.282         | 1.224         | 1.871         | -1.645        | -2.478        | -1.533        |
| PNKP         | polynucleotide kinase 3'-phosphatase (PNKP)                                                             | -0.252       | -0.445        | -0.134        | -0.062        | 0.862         | 0.566         | 0.383         |
| <b>POLB</b>  | polymerase (DNA directed), beta (POLB)                                                                  | <b>0.431</b> | <b>-0.089</b> | <b>-0.924</b> | <b>-1.059</b> | <b>0.155</b>  | <b>-0.234</b> | <b>-0.120</b> |
| <b>POLD1</b> | polymerase (DNA directed), delta 1, catalytic subunit 125kDa (POLD1)                                    | <b>1.244</b> | <b>-1.036</b> | <b>1.553</b>  | <b>0.877</b>  | <b>-0.145</b> | <b>-0.257</b> | <b>-0.683</b> |
| POLE         | polymerase (DNA directed), epsilon (POLE)                                                               | 0.163        | -2.098        | 1.486         | 0.979         | 0.431         | 0.731         | -0.070        |
| POLE3        | polymerase (DNA directed), epsilon 3 (p17 subunit) (POLE3)                                              | -0.726       | -2.139        | 0.322         | 0.007         | 0.301         | 0.602         | 0.056         |
| POLG2        | polymerase (DNA directed), gamma 2, accessory subunit (POLG2)                                           | 0.379        | -0.732        | -1.131        | -0.677        | -1.120        | -1.350        | -0.943        |
| POLH         | polymerase (DNA directed), eta (POLH)                                                                   | -0.356       | 0.553         | -0.476        | -0.427        | 0.612         | 0.668         | 0.348         |
| POLI         | polymerase (DNA directed) iota (POLI)                                                                   | -0.669       | -0.530        | -0.750        | -0.910        | 0.098         | -0.074        | 0.178         |
| POLL         | polymerase (DNA directed), lambda (POLL)                                                                | -0.090       | 0.577         | -0.036        | -0.316        | -0.227        | 0.031         | -0.218        |
| POLQ         | polymerase (DNA directed), theta (POLQ)                                                                 | -0.051       | -1.696        | 1.110         | 0.211         | 1.022         | 0.778         | 0.796         |
| PRKDC        | protein kinase, DNA-activated, catalytic polypeptide (PRKDC),                                           | -1.529       | -0.077        | -0.312        | -0.737        | 2.225         | 2.080         | 1.375         |

## transcript variant 2

|          |                                                                                                      |        |        |        |        |        |        |        |
|----------|------------------------------------------------------------------------------------------------------|--------|--------|--------|--------|--------|--------|--------|
| PRPF19   | PRP19/PSO4 pre-mRNA processing factor 19 homolog ( <i>S. cerevisiae</i> ) (PRPF19)                   | 0.723  | -0.293 | 0.616  | 0.664  | -0.280 | -0.445 | -0.475 |
| PTTG1    | pituitary tumor-transforming 1 (PTTG1)                                                               | 2.439  | -0.313 | 2.299  | 2.607  | -0.942 | -2.007 | -1.000 |
| RAD1     | RAD1 homolog ( <i>S. pombe</i> ) (RAD1), transcript variant 3                                        | -0.238 | 0.047  | -0.401 | -0.144 | 0.542  | 0.287  | 0.539  |
| RAD17    | RAD17 homolog ( <i>S. pombe</i> ) (RAD17), transcript variant 6                                      | 0.080  | 0.217  | 0.466  | 0.520  | -0.446 | 0.184  | -0.517 |
| RAD18    | RAD18 homolog ( <i>S. cerevisiae</i> ) (RAD18)                                                       | -0.601 | -0.524 | 0.116  | -0.014 | 0.131  | 0.762  | 0.636  |
| RAD21    | RAD21 homolog ( <i>S. pombe</i> ) (RAD21)                                                            | 0.718  | -0.011 | 0.608  | 0.633  | -1.192 | -0.677 | -1.469 |
| RAD23A   | RAD23 homolog A ( <i>S. cerevisiae</i> ) (RAD23A)                                                    | 1.096  | -0.271 | 0.804  | 0.837  | 0.075  | -0.078 | -0.180 |
| RAD23B   | RAD23 homolog B ( <i>S. cerevisiae</i> ) (RAD23B)                                                    | -0.899 | -0.336 | 0.003  | -0.112 | 1.155  | 1.058  | 0.763  |
| RAD50    | RAD50 homolog ( <i>S. cerevisiae</i> ) (RAD50), transcript variant 2                                 | -0.200 | 0.706  | -0.297 | -0.442 | 0.361  | 0.538  | 0.297  |
| RAD51    | RAD51 homolog (RecA homolog, <i>E. coli</i> ) ( <i>S. cerevisiae</i> ) (RAD51), transcript variant 1 | 0.942  | -1.596 | 2.335  | 1.947  | -0.471 | -0.373 | -0.716 |
| RAD51AP1 | RAD51 associated protein 1 (RAD51AP1)                                                                | 1.313  | -3.483 | 1.821  | 2.054  | -1.899 | -1.780 | -1.555 |
| RAD51C   | RAD51 homolog C ( <i>S. cerevisiae</i> ) (RAD51C), transcript variant 2                              | 3.108  | 0.131  | 1.794  | 2.332  | -2.175 | -2.741 | -2.488 |
| RAD51L1  | RAD51-like 1 ( <i>S. cerevisiae</i> ) (RAD51L1), transcript variant 1                                | 0.026  | 0.776  | 0.302  | 0.453  | 0.020  | 0.223  | 0.349  |
| RAD51L3  | RAD51-like 3 ( <i>S. cerevisiae</i> ) (RAD51L3), transcript variant 4                                | 1.199  | -0.822 | 0.717  | 1.008  | -0.985 | -1.237 | -1.290 |
| RAD52    | RAD52 homolog ( <i>S. cerevisiae</i> ) (RAD52)                                                       | -0.125 | 0.506  | 0.368  | 0.075  | 0.186  | 0.156  | -0.028 |
| RAD54B   | RAD54 homolog B ( <i>S. cerevisiae</i> ) (RAD54B)                                                    | 0.160  | -0.166 | 0.421  | 0.730  | -0.447 | -0.133 | 0.009  |
| RAD54L   | RAD54-like ( <i>S. cerevisiae</i> ) (RAD54L)                                                         | 0.485  | -1.054 | 1.289  | 1.306  | 0.443  | -0.214 | 0.127  |
| RBX1     | ring-box 1 (RBX1)                                                                                    | 1.483  | 0.693  | 0.735  | 1.733  | -0.742 | -1.479 | -0.024 |
| RECQL    | RecQ protein-like (DNA helicase Q1-like) (RECQL), transcript variant 1                               | -1.002 | -1.475 | -0.592 | -1.706 | 1.134  | 1.113  | 0.734  |
| RECQL5   | RecQ protein-like 5 (RECQL5), transcript variant 1                                                   | 0.822  | 1.408  | 0.704  | 0.109  | -0.669 | -0.355 | -0.454 |
| REV1     | REV1 homolog ( <i>S. cerevisiae</i> ) (REV1), transcript variant 1                                   | -1.265 | -0.327 | -0.737 | -0.757 | 0.812  | 1.037  | 0.805  |
| REV3L    | REV3-like, catalytic subunit of DNA polymerase zeta (yeast) (REV3L)                                  | -1.092 | 2.784  | -3.165 | -2.465 | 0.227  | -0.150 | -0.117 |
| RFC1     | replication factor C (activator 1) 1, 145kDa (RFC1)                                                  | -0.261 | -0.406 | -0.602 | -0.137 | 0.185  | 0.472  | 0.405  |
| RFC5     | replication factor C (activator 1) 5, 36.5kDa (RFC5), transcript variant 1                           | 0.832  | -2.234 | 1.842  | 1.573  | -0.657 | -0.806 | -0.454 |
| RPA1     | replication protein A1, 70kDa                                                                        | 0.802  | -0.316 | 1.216  | 1.050  | -0.507 | -0.471 | -0.878 |

|            |                                                                                                 |              |              |              |              |               |               |               |
|------------|-------------------------------------------------------------------------------------------------|--------------|--------------|--------------|--------------|---------------|---------------|---------------|
|            | (RPA1)                                                                                          |              |              |              |              |               |               |               |
| RPA2       | replication protein A2, 32kDa (RPA2)                                                            | 1.951        | -0.194       | 0.879        | 1.023        | -1.151        | -1.484        | -1.247        |
| RPAIN      | RPA interacting protein (RPAIN)                                                                 | 2.900        | 2.389        | 0.828        | 1.454        | -2.487        | -2.890        | -2.417        |
| RPLP0      | ribosomal protein, large, P0 (RPLP0), transcript variant 2                                      | 2.083        | 1.764        | 1.553        | 2.222        | -2.184        | -2.583        | -2.195        |
| RPS3       | ribosomal protein S3 (RPS3)                                                                     | 0.250        | 1.681        | 0.697        | 1.091        | -0.851        | -0.314        | 0.160         |
| RRM2B      | ribonucleotide reductase M2 B (TP53 inducible) (RRM2B)                                          | 0.335        | 1.141        | -1.517       | -1.161       | -0.616        | -0.871        | -0.358        |
| RUVBL2     | RuvB-like 2 (E. coli) (RUVBL2)                                                                  | 0.838        | -1.418       | 0.810        | 0.966        | 0.063         | -0.078        | -0.200        |
| SFPQ       | splicing factor proline/glutamine-rich (polypyrimidine tract binding protein associated) (SFPQ) | -1.158       | -1.860       | -0.112       | -0.193       | 0.830         | 0.775         | 1.510         |
| SHPRH      | SNF2 histone linker PHD RING helicase (SHPRH), transcript variant 2                             | -0.661       | -0.232       | -0.688       | -0.936       | -0.014        | 0.240         | 0.342         |
| SMC3       | structural maintenance of chromosomes 3 (SMC3)                                                  | 0.979        | 0.038        | 0.971        | 0.582        | -0.341        | -0.478        | -0.484        |
| SMC5       | structural maintenance of chromosomes 5 (SMC5)                                                  | -0.306       | -0.053       | 0.151        | -0.103       | -0.043        | 0.340         | 0.080         |
| SMC6       | structural maintenance of chromosomes 6 (SMC6)                                                  | 0.732        | -1.086       | 1.256        | 1.275        | -0.726        | -0.771        | -0.745        |
| SMUG1      | single-strand-selective monofunctional uracil-DNA glycosylase 1 (SMUG1)                         | 0.516        | -0.321       | 0.199        | 0.220        | -0.082        | -0.202        | -0.340        |
| SSB        | Sjogren syndrome antigen B (autoantigen La) (SSB)                                               | 0.395        | 0.349        | 0.412        | 0.594        | -0.068        | -0.223        | 0.143         |
| SSRP1      | structure specific recognition protein 1 (SSRP1)                                                | 1.470        | -0.126       | 1.326        | 1.926        | -0.295        | -0.715        | -0.958        |
| SUPT16H    | suppressor of Ty 16 homolog (S. cerevisiae) (SUPT16H)                                           | -0.255       | -0.441       | -0.024       | -0.005       | 0.357         | 0.671         | 0.542         |
| TDG        | thymine-DNA glycosylase (TDG)                                                                   | -0.196       | -0.283       | -0.586       | -0.828       | 0.164         | 1.261         | 0.645         |
| TDP1       | tyrosyl-DNA phosphodiesterase 1 (TDP1), transcript variant 1                                    | -0.342       | 0.296        | 0.658        | 0.175        | 1.218         | 1.157         | 1.054         |
| TNFAIP1    | tumor necrosis factor, alpha-induced protein 1 (endothelial) (TNFAIP1)                          | -0.090       | 1.769        | -0.689       | -0.818       | 0.770         | 0.893         | 0.975         |
| TOPBP1     | topoisomerase (DNA) II binding protein 1 (TOPBP1)                                               | -0.926       | -2.490       | -0.095       | -0.647       | 1.251         | 1.107         | 0.500         |
| TPP1       | tripeptidyl peptidase I (TPP1)                                                                  | 0.622        | 2.346        | -0.300       | -0.378       | 0.160         | -0.064        | 0.224         |
| TREX1      | three prime repair exonuclease 1 (TREX1), transcript variant 2                                  | -0.262       | 0.151        | 0.143        | 0.590        | -0.155        | 0.350         | 0.458         |
| TYMS       | thymidylate synthetase (TYMS)                                                                   | 2.320        | -3.072       | 3.886        | 3.169        | -3.057        | -2.768        | -2.440        |
| UBE2B      | ubiquitin-conjugating enzyme E2B (RAD6 homolog) (UBE2B)                                         | -0.688       | 0.148        | -0.241       | -0.351       | 0.171         | 0.693         | 0.676         |
| UBE2N      | ubiquitin-conjugating enzyme E2N (UBC13 homolog, yeast) (UBE2N)                                 | -0.475       | -1.039       | 0.663        | 0.544        | 0.638         | 0.460         | 0.762         |
| UHRF1      | ubiquitin-like, containing PHD and RING finger domains, 1 (UHRF1), transcript variant 1         | -0.015       | -4.041       | 3.284        | 2.577        | 0.172         | 0.166         | -0.111        |
| <b>UNG</b> | uracil-DNA glycosylase (UNG), transcript variant 2                                              | <b>1.010</b> | <b>0.035</b> | <b>0.876</b> | <b>1.207</b> | <b>-1.061</b> | <b>-0.453</b> | <b>-0.099</b> |
| UVRAG      | UV radiation resistance associated gene (UVRAG)                                                 | -0.087       | 0.162        | -0.911       | -0.935       | 0.195         | 0.052         | 0.298         |

|              |                                                                                                                                       |              |               |              |              |               |               |               |
|--------------|---------------------------------------------------------------------------------------------------------------------------------------|--------------|---------------|--------------|--------------|---------------|---------------|---------------|
| WRNIP1       | Werner helicase interacting protein 1 (WRNIP1), transcript variant 1                                                                  | 0.082        | 0.193         | 0.341        | 0.116        | -0.335        | -0.237        | -0.837        |
| XAB2         | XPA binding protein 2 (XAB2)                                                                                                          | 1.522        | 0.199         | 0.180        | -0.085       | -0.878        | -1.097        | -1.104        |
| XPA          | xeroderma pigmentosum, complementation group A (XPA)                                                                                  | 0.146        | -0.166        | 0.209        | 0.422        | -0.448        | -0.148        | -0.183        |
| XPC          | xeroderma pigmentosum, complementation group C (XPC)                                                                                  | 0.937        | 1.673         | -0.741       | -0.465       | -1.194        | -1.176        | -1.207        |
| <b>XRCC1</b> | X-ray repair complementing defective repair in Chinese hamster cells 1 (XRCC1)                                                        | <b>1.179</b> | <b>-0.634</b> | <b>0.728</b> | <b>0.473</b> | <b>-0.633</b> | <b>-0.953</b> | <b>-1.080</b> |
| XRCC2        | X-ray repair complementing defective repair in Chinese hamster cells 2 (XRCC2)                                                        | -0.204       | 0.356         | 0.341        | 0.492        | 0.233         | 0.520         | 0.470         |
| XRCC3        | X-ray repair complementing defective repair in Chinese hamster cells 3 (XRCC3), transcript variant 3                                  | 0.747        | -0.693        | 0.471        | 0.863        | -0.152        | -0.322        | -0.018        |
| XRCC4        | X-ray repair complementing defective repair in Chinese hamster cells 4 (XRCC4), transcript variant 2                                  | -0.474       | -0.341        | -0.337       | -0.169       | -0.003        | 0.305         | 0.558         |
| XRCC5        | X-ray repair complementing defective repair in Chinese hamster cells 5 (double-strand-break rejoining; Ku autoantigen, 80kDa) (XRCC5) | -1.609       | -0.211        | 0.101        | -0.520       | 1.142         | 1.594         | 1.900         |
| XRCC6        | X-ray repair complementing defective repair in Chinese hamster cells 6 (Ku autoantigen, 70kDa) (XRCC6)                                | -0.700       | -1.015        | 0.195        | -0.260       | 0.596         | 1.191         | 0.661         |
| XRN2         | 5'-3' exoribonuclease 2 (XRN2)                                                                                                        | -0.157       | -0.467        | -0.264       | -0.996       | -0.293        | 0.201         | -0.679        |
